# Supplementary material
Source: PubMed Central journal article supplement (PMC3937766)
Supplement: NIHMS524966-supplement-01.pdf [file NIHMS524966-supplement-01.pdf]

**Table 5: Statistical power for the various studies to find associations between *CAV1/CAV2* polymorphisms and primary open angle glaucoma (POAG).<sup>1</sup>**

| Cohort                          | n cases | n controls | OR  | Power (%) in a multiplicative model | Power (%) in an additive model |
|---------------------------------|---------|------------|-----|-------------------------------------|--------------------------------|
| GLAUGEN                         | 976     | 1140       | 1.2 | 13                                  | 12                             |
| NEIGHBOR                        | 2132    | 2290       | 1.2 | 62                                  | 57                             |
| Pooled GLAUGEN and NEIGHBOR     | 3108    | 3430       | 1.2 | 86                                  | 82                             |
| Icelandic study <sup>3</sup>    | 1263    | 10,000     | 1.2 | 61                                  | 55                             |
| Women only                      | 1682    | 1937       | 1.3 | 93                                  | 89                             |
| Men only                        | 1426    | 1493       | 1.3 | 84                                  | 77                             |
| POAG with paracentral loss only | 224     | 3430       | 1.4 | 31                                  | 24                             |
| POAG with peripheral loss only  | 993     | 3430       | 1.4 | 99                                  | 98                             |

1. All power calculations were done using the CaTS power calculator with the following parameters: p value threshold:  $7.7 \times 10^{-4}$ , disease prevalence: 0.04, disease allele frequency: 0.2. Odds ratios reflect the average odds ratio for each analysis from the top 10 overall SNPs.
2. Abbreviations: OR=odds ratio, GLAUGEN= Glaucoma Genes and Environment study, NEIGHBOR= National Eye Institute Glaucoma Human Genetics Collaboration study
3. The maximum number of controls the CaTS program allows is 10,000, so the Icelandic study power is probably slightly underestimated since it actually had 34,877 controls.
